# Supplementary material for: Dysregulation of Placental Lipid Hydrolysis by High-Fat/High-Cholesterol Feeding and Gestational Diabetes Mellitus in Mice
Source: MDPI journal article supplement (doi:10.3390/ijms232012286), 2022-10-14
Supplement: s1 [file s1]

## SUPPLEMENT

### Dysregulation of placental lipid hydrolysis by high-fat/high-cholesterol feeding and gestational diabetes mellitus in mice

by K.B. Kuentzel *et al.*

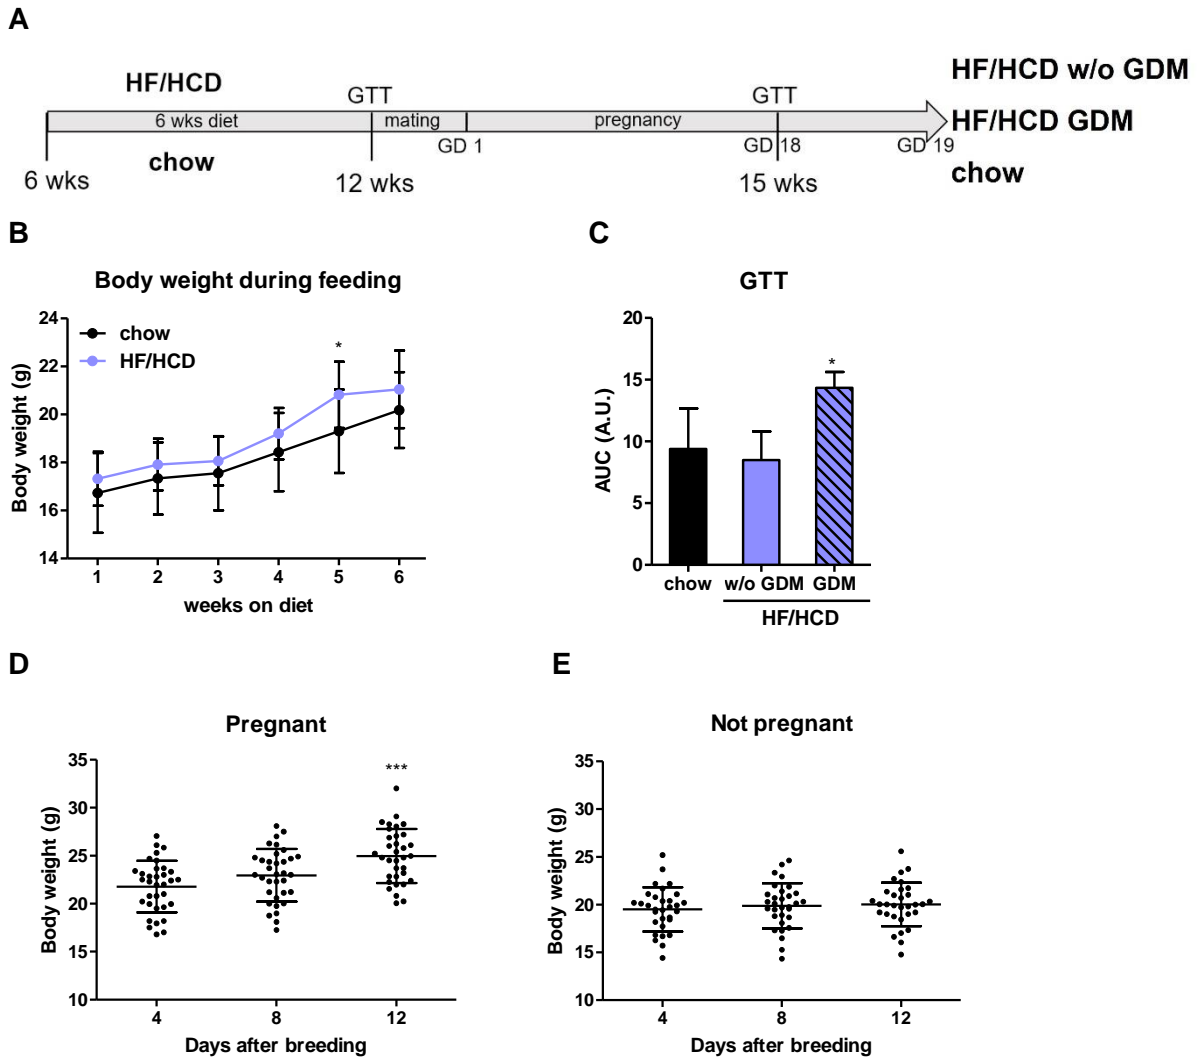

**Figure S1: Generation of the GDM mouse model.** (A) Experimental setup and timeline for the generation of a GDM mouse model; HF/HCD – high fat/high cholesterol diet; GTT – glucose tolerance test; GD – gestational day. (B) Body weight during HF/HCD feeding prior to mating. (C) Area under the curve (AUC) of the GTT of pregnant mice (n = 3 chow, 8 HF/HCD w/o GDM, 4 HF/HCD GDM). (D, E) Pregnancy detection in mice according to maternal weight gain, n = 34 (not pregnant), 31 (pregnant). Data represent mean  $\pm$  SD and were analyzed with 1-way ANOVA followed by Bonferroni post-hoc test. \*  $p < 0.05$ , \*\*\*  $p \leq 0.001$ .

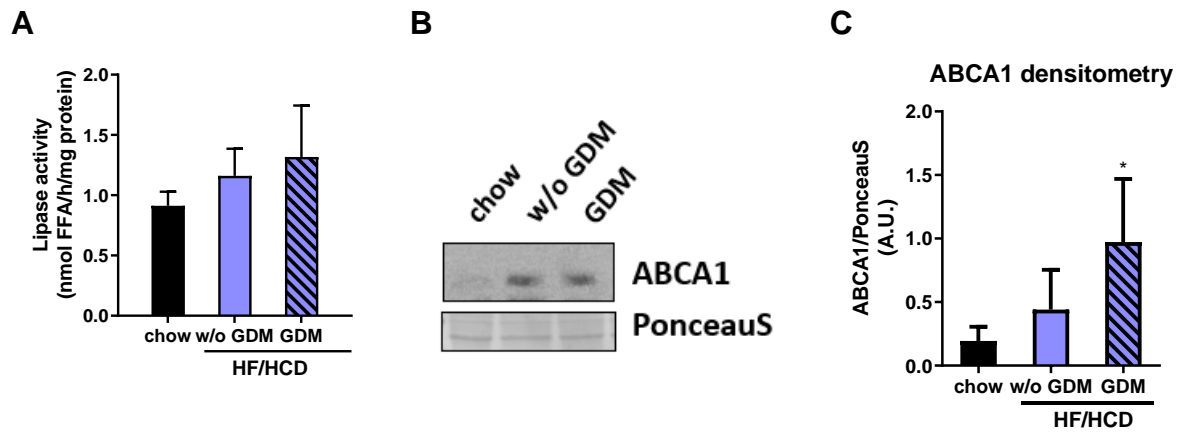

**Figure S2: Increased placental cholesterol export in GDM.** (A) Acid CE hydrolase activity in placentae of chow, HF/HCD w/o GDM, and HF/HCD GDM dams (n = 4-5). (B) Western blot analysis of ABCA1 and (C) densitometry in placentae of chow, HF/HCD w/o GDM, and HF/HCD GDM dams, representative blot shown (n = 2). Data represent mean + SD and were analyzed with 1-way ANOVA followed by Bonferroni post-hoc test. \* p < 0.05.

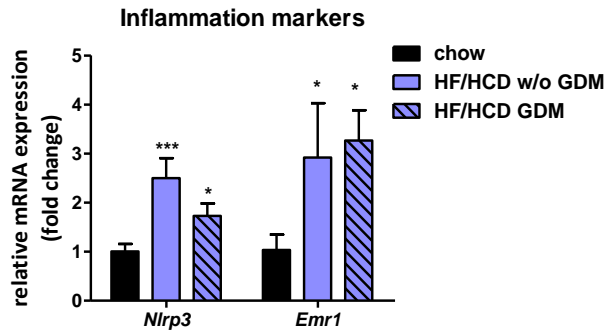

**Figure S3: Increased inflammation and macrophage abundance accompanying HF/HCD feeding and GDM.** Gene expression levels of inflammatory (*Nlrp3*) and macrophage (*Emr1*) markers in placentae from chow diet-fed mice and after HF/HCD feeding w/o and with GDM (n = 4). Data represent mean + SD and were analyzed with 1-way ANOVA followed by Bonferroni post-hoc test. \*  $p < 0.05$ , \*\*\*  $p \leq 0.001$ , indicating the comparison to the chow condition.

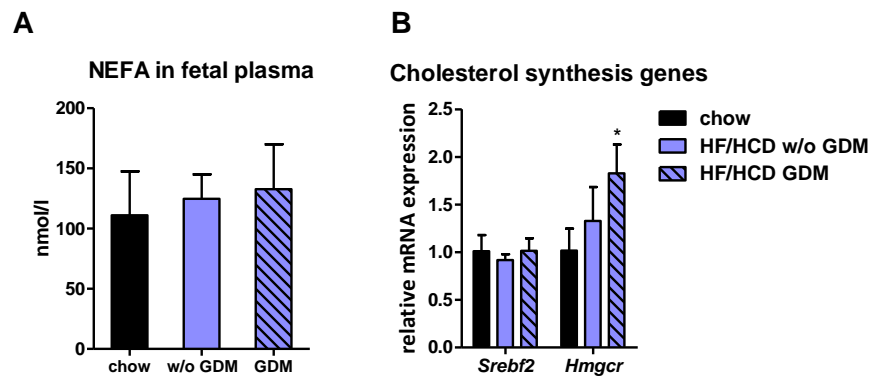

**Figure S4: Unaltered fetal plasma FA levels upon HF/HCD feeding and GDM.** (A) Concentrations of non-esterified FA (NEFA) in the plasma of chow diet, HF/HCD without and with GDM mice (n = 4). (B) mRNA expression of cholesterol synthesis genes (n = 4). Data represent mean + SD and were analyzed with 1-way ANOVA followed by Bonferroni post-hoc test. \* p < 0.05
